# Supplementary material for: Bacterial Metabolic Potential in Response to Climate Warming Alters the Decomposition Process of Aquatic Plant Litter—In Shallow Lake Mesocosms
Source: MDPI journal article supplement (doi:10.3390/microorganisms10071327), 2022-06-30
Supplement: s1 [file s1]

## Supplementary Materials

Table S1 The bacterial function in leaf and stem litter related to the carbon cycle

| Functions                                     | Mean±SE (leaf) | Mean±SE (stem) |
|-----------------------------------------------|----------------|----------------|
| Chemo-1                                       | 8548±2011      | 9614±2560      |
| Methylotrophy                                 | 1560±367       | 1265±291       |
| Photoheterotrophy                             | 1707±312       | 1912±386       |
| Oxygenic photoautotrophy                      | 1200±403       | 1310±370       |
| Fermentation                                  | 1561±397       | 1772±199       |
| Chemo-2                                       | 1247±405       | 1904±673       |
| Aromatic compound degradation                 | 189±65         | 395±183        |
| Anoxygenic photoautotrophy                    | 28±21          | 16±7           |
| Reductive acetogenesis                        | 31±21          | 17±7           |
| Aliphatic non methane hydrocarbon degradation | 17±7           | 20±6           |

Table S2 The bacterial function in leaf and stem litter related to the nitrogen cycle

| Functions         | Mean±SE (leaf) | Mean±SE (stem) |
|-------------------|----------------|----------------|
| Nitrogen fixation | 857±230        | 771±225        |
| Ureolysis         | 659±148        | 1151±313       |
| Nitrate reduction | 433±113        | 1199±690       |
| Ammonification    | 84±48          | 633±596        |
| Denitrification   | 3±2            | 4±1            |
| Nitrification     | 0±0            | 0±0            |

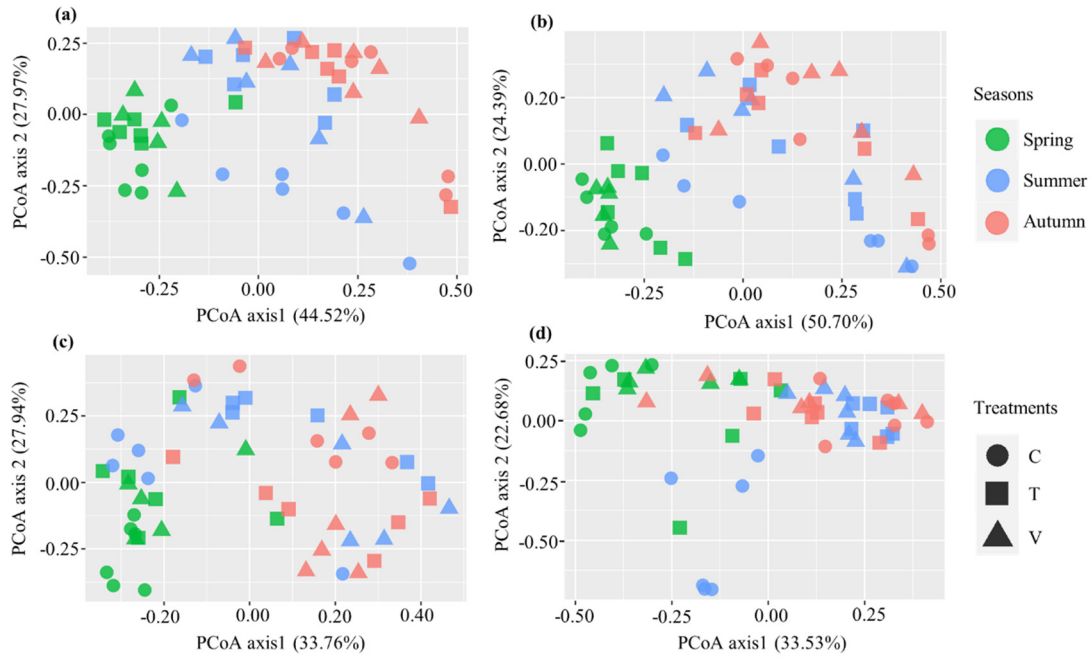

Figure S1. Plots for principal coordinates analysis (PCoA) based on the Bray-Curtis dissimilarities of bacterial function related to carbon cycle in leaf (a) and stem (b) litter, and Plots for principal coordinates analysis (PCoA) based on the Bray-Curtis dissimilarities of bacterial function related to nitrogen cycle in leaf (c) and stem (d) litter.

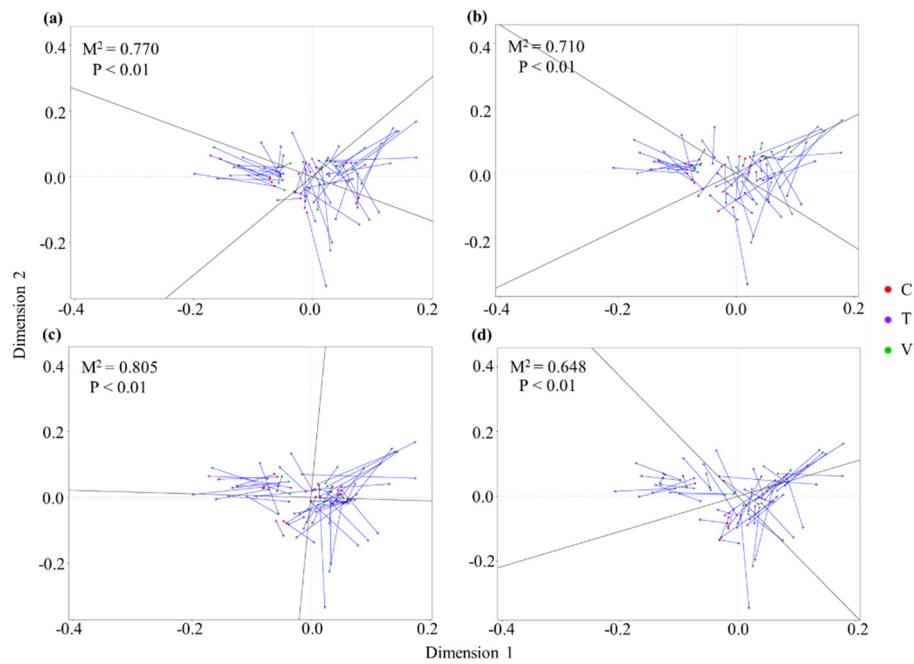

Figure S2. Procrustes analysis of bacterial function related to carbon cycle in leaf (a) and stem (b) litter,

and procrustes analysis of bacterial function related to nitrogen cycle in leaf (c) and stem (d) litter. The points mapped on the main orthogonal axis are quadrats from the environmental variable PCA, and the points mapped on the oblique orthogonal axis are quadrats from the bacterial functional community constituting the PCA. The arrows indicate the paired quadrats from the two. The smaller  $M^2$  is, the higher the correlation degree of the two data sets is, and  $P$  reaches the significance level ( $p < 0.05$ ), that the two data sets showed greater consistency.

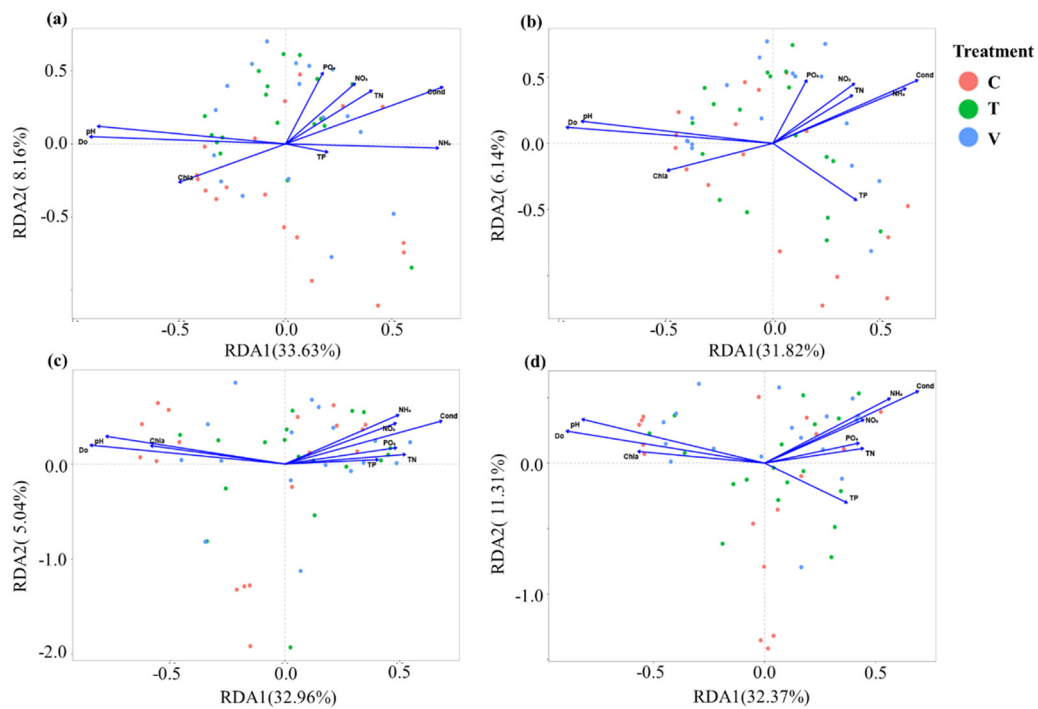

Figure S3. Redundancy analysis of bacterial function and environmental factors related to the carbon cycle of leaf (a) and stem (b) litter and the nitrogen cycle of leaf (c) and stem (d) litter.
